# Supplementary material
Source: HighWire-hosted journal article supplement (https://www.cmajopen.ca/highwire/filestream/81295/field_highwire_adjunct_files/0/2019-0204-1-at.pdf)
Supplement: 2019-0204-1-at.pdf [file 2019-0204-1-at.pdf]

**Appendix 1 (as supplied by the authors): Chiropractic websites identified with content regarding vaccination**

| No.     | Unique primary website                                                                                                                                                                                                                | Message portrayal | WRRT total score (0-100%) | WRRT star rating (0-5) |
|---------|---------------------------------------------------------------------------------------------------------------------------------------------------------------------------------------------------------------------------------------|-------------------|---------------------------|------------------------|
| Ontario |                                                                                                                                                                                                                                       |                   |                           |                        |
| 1       | <a href="http://amlingerfamilychiropractic.com/heal_th_page.php?page=/dcnewsletter/march13">http://amlingerfamilychiropractic.com/heal_th_page.php?page=/dcnewsletter/march13</a>                                                     | negative          | 14.3                      | 1                      |
| 2       | <a href="http://bosnarhealth.com/?page_id=69">http://bosnarhealth.com/?page_id=69</a>                                                                                                                                                 | negative          | 35.7                      | 2                      |
| 3       | <a href="http://cdn2.perfectpatients.com/childsites/uploads/1117/files/hpv-report-2014.pdf">http://cdn2.perfectpatients.com/childsites/uploads/1117/files/hpv-report-2014.pdf</a>                                                     | negative          | 39.3                      | 2                      |
| 4       | <a href="http://circle-of-life.ca/?p=58">http://circle-of-life.ca/?p=58</a>                                                                                                                                                           | negative          | 26.8                      | 1                      |
| 5       | <a href="http://divinespine.ca/blog/flu-shot-fallacies/">http://divinespine.ca/blog/flu-shot-fallacies/</a>                                                                                                                           | negative          | 7.1                       | 0                      |
| 6       | <a href="http://docferguson.com/frequently-asked-questions/">http://docferguson.com/frequently-asked-questions/</a>                                                                                                                   | negative          | 17.9                      | 1                      |
| 7       | <a href="http://drbenkim.com/">http://drbenkim.com/</a>                                                                                                                                                                               | negative          | 26.8                      | 1                      |
| 8       | <a href="http://drdgroleau.com/2014/08/29/vaccinations-not-mandatory-for-ontario-students/comment-page-1/#comment-20">http://drdgroleau.com/2014/08/29/vaccinations-not-mandatory-for-ontario-students/comment-page-1/#comment-20</a> | negative          | 23.2                      | 1                      |
| 9       | <a href="http://drdianemeyer.com/">http://drdianemeyer.com/</a>                                                                                                                                                                       | negative          | 62.5                      | 3                      |
| 10      | <a href="http://hamiltonchiro.ca/">http://hamiltonchiro.ca/</a>                                                                                                                                                                       | negative          | 60.7                      | 3                      |
| 11      | <a href="http://hopechiropractic.ca/why-chiropractic/chiropractic-research/ear-infections/">http://hopechiropractic.ca/why-chiropractic/chiropractic-research/ear-infections/</a>                                                     | negative          | 14.3                      | 1                      |
| 12      | <a href="http://innerbalancechiropractic.ca/">http://innerbalancechiropractic.ca/</a>                                                                                                                                                 | negative          | 26.8                      | 1                      |
| 13      | <a href="http://nrfc.ca/187/the-flu-shot/">http://nrfc.ca/187/the-flu-shot/</a>                                                                                                                                                       | negative          | 14.3                      | 1                      |
| 14      | <a href="http://optimumwellnesscentres.com/april-8-2011-chronic-fatigue/">http://optimumwellnesscentres.com/april-8-2011-chronic-fatigue/</a>                                                                                         | negative          | 19.8                      | 1                      |
| 15      | <a href="http://p3health.net/?s=vaccin">http://p3health.net/?s=vaccin</a>                                                                                                                                                             | negative          | 35.3                      | 3                      |
| 16      | <a href="http://paramountfamilychiropractic.com/">http://paramountfamilychiropractic.com/</a>                                                                                                                                         | negative          | 62.5                      | 3                      |
| 17      | <a href="http://pikechiropractic.com/blog/flu-shot-hoax">http://pikechiropractic.com/blog/flu-shot-hoax</a>                                                                                                                           | negative          | 32.4                      | 2                      |
| 18      | <a href="http://stallaertchiropractic.com/blog/13/118/4-Tips-to-Stay-HEALTHY-This-Flu-Season.html">http://stallaertchiropractic.com/blog/13/118/4-Tips-to-Stay-HEALTHY-This-Flu-Season.html</a>                                       | negative          | 7.1                       | 0                      |
| 19      | <a href="http://thechiropracticphilanthropist.com/191-dr-nancy-tarlow-the-vaccination-conversation/">http://thechiropracticphilanthropist.com/191-dr-nancy-tarlow-the-vaccination-conversation/</a>                                   | negative          | 17.9                      | 1                      |
| 20      | <a href="http://wellingtonchiropracticandwellnessgroup.com/">http://wellingtonchiropracticandwellnessgroup.com/</a>                                                                                                                   | negative          | 34.8                      | 3                      |
| 21      | <a href="http://www.adiochiropractic.net/">http://www.adiochiropractic.net/</a>                                                                                                                                                       | negative          | 42.9                      | 2                      |
| 22      | <a href="http://www.alconachiropractic.ca/">http://www.alconachiropractic.ca/</a>                                                                                                                                                     | negative          | 14.3                      | 1                      |

|    |                                                                                                                                                                                             |          |      |   |
|----|---------------------------------------------------------------------------------------------------------------------------------------------------------------------------------------------|----------|------|---|
| 23 | <a href="http://www.alliancechiroandwellness.com/Newsletters/AllianceIssue37.pdf">http://www.alliancechiroandwellness.com/Newsletters/AllianceIssue37.pdf</a>                               | negative | 23.2 | 2 |
| 24 | <a href="http://www.axischiropractic.com/Family%20Care/Family%20Care.html">http://www.axischiropractic.com/Family%20Care/Family%20Care.html</a>                                             | negative | 24.1 | 2 |
| 25 | <a href="http://www.chiropracticgeneration.com/">http://www.chiropracticgeneration.com/</a>                                                                                                 | negative | 45.2 | 3 |
| 26 | <a href="http://www.cornerstonehealth.ca/naturopathy/h1n1-hysteria/">http://www.cornerstonehealth.ca/naturopathy/h1n1-hysteria/</a>                                                         | negative | 26.8 | 1 |
| 27 | <a href="http://www.drbarryyoung.com/">http://www.drbarryyoung.com/</a>                                                                                                                     | negative | 10.7 | 1 |
| 28 | <a href="http://www.drvalliant.com/">http://www.drvalliant.com/</a>                                                                                                                         | negative | 42.9 | 3 |
| 29 | <a href="http://www.haltonchiropractor.com/articles/article-flu-shot/">http://www.haltonchiropractor.com/articles/article-flu-shot/</a>                                                     | negative | 16.1 | 1 |
| 30 | <a href="http://www.kawarthalakeschiropracticblog.com/613/fibromyalgia-facts/">http://www.kawarthalakeschiropracticblog.com/613/fibromyalgia-facts/</a>                                     | negative | 14.8 | 1 |
| 31 | <a href="http://www.livewellchiro.ca/index.php?p=439641&amp;s=245&amp;articleid=216">http://www.livewellchiro.ca/index.php?p=439641&amp;s=245&amp;articleid=216</a>                         | negative | 58.9 | 3 |
| 32 | <a href="http://www.mainfamilychiro.com/articles/Flu+Colds/">http://www.mainfamilychiro.com/articles/Flu+Colds/</a>                                                                         | negative | 7.1  | 0 |
| 33 | <a href="http://www.mypurebalance.ca/">http://www.mypurebalance.ca/</a>                                                                                                                     | negative | 10.7 | 1 |
| 34 | <a href="http://www.oakvilleuptownchiropractor.ca/natural-health-information/shot-in-the-dark/">http://www.oakvilleuptownchiropractor.ca/natural-health-information/shot-in-the-dark/</a>   | negative | 20.5 | 1 |
| 35 | <a href="http://www.optimumwellnessclinic.ca/">http://www.optimumwellnessclinic.ca/</a>                                                                                                     | negative | 23.8 | 2 |
| 36 | <a href="http://www.phoenixhealth.me/add-and-adhd/">http://www.phoenixhealth.me/add-and-adhd/</a>                                                                                           | negative | 26.8 | 2 |
| 37 | <a href="http://www.spinewise.ca/the-natural-way-to-maximize-your-childs-health/">http://www.spinewise.ca/the-natural-way-to-maximize-your-childs-health/</a>                               | negative | 17.9 | 1 |
| 38 | <a href="http://www.thenaturalwayclinic.com/">http://www.thenaturalwayclinic.com/</a>                                                                                                       | negative | 9.8  | 0 |
| 39 | <a href="http://www.wellnessfirst.ca/Articles/E26-%20Death%20by%20Vaccines.doc">http://www.wellnessfirst.ca/Articles/E26-%20Death%20by%20Vaccines.doc</a>                                   | negative | 14.3 | 1 |
| 40 | <a href="http://www.woodbridgechiropractor.ca/articles/Flu+Colds/">http://www.woodbridgechiropractor.ca/articles/Flu+Colds/</a>                                                             | negative | 20.5 | 1 |
| 41 | <a href="http://yournewlifenow.blogspot.ca/">http://yournewlifenow.blogspot.ca/</a>                                                                                                         | negative | 16.1 | 1 |
| 42 | <a href="http://www.nvic.org/reporting-systems.aspx">http://www.nvic.org/reporting-systems.aspx</a>                                                                                         | negative | 12.5 | 1 |
| 43 | <a href="http://lifechiropracticcentre.ca/chiropractic-care/measles-and-vaccination-information">http://lifechiropracticcentre.ca/chiropractic-care/measles-and-vaccination-information</a> | neutral  | 14.3 | 1 |
| 44 | <a href="http://maximizedhealth.ca/chiropractic-benefits/boost-your-immunity-naturally/">http://maximizedhealth.ca/chiropractic-benefits/boost-your-immunity-naturally/</a>                 | neutral  | 14.3 | 1 |
| 45 | <a href="http://summitnaturalhealth.ca/">http://summitnaturalhealth.ca/</a>                                                                                                                 | neutral  | 42.9 | 2 |
| 46 | <a href="http://www.chiro-docs.com/index.php?p=415709&amp;s=245&amp;articleid=2385">http://www.chiro-docs.com/index.php?p=415709&amp;s=245&amp;articleid=2385</a>                           | neutral  | 55.4 | 3 |
| 47 | <a href="http://www.kihclinic.com/articles/the-h1n1-vaccine">http://www.kihclinic.com/articles/the-h1n1-vaccine</a>                                                                         | neutral  | 16.1 | 1 |

|    |                                                                                                                                                                                                                                                   |          |      |   |
|----|---------------------------------------------------------------------------------------------------------------------------------------------------------------------------------------------------------------------------------------------------|----------|------|---|
| 48 | <a href="http://www.lakeshorechiropractic.com/index.php?p=65615&amp;s=245&amp;articleid=2385">http://www.lakeshorechiropractic.com/index.php?p=65615&amp;s=245&amp;articleid=2385</a>                                                             | neutral  | 42.9 | 2 |
| 49 | <a href="http://www.meridianspineandsport.ca/?s=vaccin">http://www.meridianspineandsport.ca/?s=vaccin</a>                                                                                                                                         | neutral  | 17.9 | 1 |
| 50 | <a href="http://www.pinewoodhealth.ca/blog/general-category/dont-want-the-flu-shot/">http://www.pinewoodhealth.ca/blog/general-category/dont-want-the-flu-shot/</a>                                                                               | neutral  | 12.5 | 1 |
| 51 | <a href="http://www.thetorontochiropractor.com/index.php?p=407212&amp;s=245&amp;articleid=2385">http://www.thetorontochiropractor.com/index.php?p=407212&amp;s=245&amp;articleid=2385</a>                                                         | neutral  | 17.9 | 1 |
| 52 | <a href="http://globalnews.ca/news/1804162/canadian-study-finds-flu-shot-could-increase-risk-of-getting-sick/">http://globalnews.ca/news/1804162/canadian-study-finds-flu-shot-could-increase-risk-of-getting-sick/</a>                           | neutral  | 28.6 | 1 |
| 53 | <a href="https://www.facebook.com/permalink.php?story_fbid=222612737804579&amp;id=195816277123383">https://www.facebook.com/permalink.php?story_fbid=222612737804579&amp;id=195816277123383</a>                                                   | neutral  | 10.7 | 1 |
| 54 | <a href="http://www.kcnh.ca/docs/Cold-Flu-Prevention-Treatment.pdf">http://www.kcnh.ca/docs/Cold-Flu-Prevention-Treatment.pdf</a>                                                                                                                 | neutral  | 42.9 | 2 |
| 55 | <a href="http://advancedhealth.ca/conditions/infant-child-and-adolescent-health-concerns/vaccination-and-immunization.html">http://advancedhealth.ca/conditions/infant-child-and-adolescent-health-concerns/vaccination-and-immunization.html</a> | positive | 22.3 | 1 |
| 56 | <a href="http://advancedhealthrecovery.ca/12-way-to-have-a-healthy-holiday-season/">http://advancedhealthrecovery.ca/12-way-to-have-a-healthy-holiday-season/</a>                                                                                 | positive | 39.3 | 2 |
| 57 | <a href="http://applecreeksportsmedicine.com/july-28th-is-world-hepatitis-day/">http://applecreeksportsmedicine.com/july-28th-is-world-hepatitis-day/</a>                                                                                         | positive | 30.4 | 2 |
| 58 | <a href="http://windsormedicalclinic.com/portfolio_posts/vaccines/">http://windsormedicalclinic.com/portfolio_posts/vaccines/</a>                                                                                                                 | positive | 48.2 | 2 |
| 59 | <a href="http://www.abbeymed.ca/abbeyupdates.html">http://www.abbeymed.ca/abbeyupdates.html</a>                                                                                                                                                   | positive | 17.9 | 1 |
| 60 | <a href="http://www.adelaideclinic.com/Living-Well/so-youre-pregnantwhat-now-519167">http://www.adelaideclinic.com/Living-Well/so-youre-pregnantwhat-now-519167</a>                                                                               | positive | 17.9 | 1 |
| 61 | <a href="http://www.belmarrahealth.com/">http://www.belmarrahealth.com/</a>                                                                                                                                                                       | positive | 34.8 | 2 |
| 62 | <a href="http://www.hazeldeanchiropractic.com/how-i-read-a-news-article/">http://www.hazeldeanchiropractic.com/how-i-read-a-news-article/</a>                                                                                                     | positive | 14.3 | 1 |
| 63 | <a href="http://www.physiomed.ca/blog/general-tips/surviving-cold-flu-season/">http://www.physiomed.ca/blog/general-tips/surviving-cold-flu-season/</a>                                                                                           | positive | 10.7 | 1 |
| 64 | <a href="http://www.sportmedicineclinic.com/Living-Well/so-youre-pregnantwhat-now-519163">http://www.sportmedicineclinic.com/Living-Well/so-youre-pregnantwhat-now-519163</a>                                                                     | positive | 23.2 | 1 |
| 65 | <a href="http://www.torontoathleticclub.com/living-well/so-youre-pregnantwhat-now-519161">http://www.torontoathleticclub.com/living-well/so-youre-pregnantwhat-now-519161</a>                                                                     | positive | 10.7 | 1 |
| 66 | <a href="http://www.waterloowellingtonlhin.on.ca/en/newsandstories/current_news/20141023fluupdate.aspx">http://www.waterloowellingtonlhin.on.ca/en/newsandstories/current_news/20141023fluupdate.aspx</a>                                         | positive | 17.9 | 1 |
| 67 | <a href="https://www.brightalmond.com/clinical-focus/infectious-disease/">https://www.brightalmond.com/clinical-focus/infectious-disease/</a>                                                                                                     | positive | 32.4 | 3 |

|                         |                                                                                                                                                                                                     |          |      |   |
|-------------------------|-----------------------------------------------------------------------------------------------------------------------------------------------------------------------------------------------------|----------|------|---|
| 68                      | <a href="http://www.chiropractic.ca/about-cca/code-of-ethics/vaccination-immunization/">http://www.chiropractic.ca/about-cca/code-of-ethics/vaccination-immunization/</a>                           | positive | 17.9 | 1 |
| 69                      | <a href="http://www.huffingtonpost.ca/michael-kruse/chiropractors-vaccination-debate_b_3280713.html">http://www.huffingtonpost.ca/michael-kruse/chiropractors-vaccination-debate_b_3280713.html</a> | positive | 17.9 | 1 |
| 70                      | <a href="http://www.ncbi.nlm.nih.gov/pmc/articles/PMC3743646/">http://www.ncbi.nlm.nih.gov/pmc/articles/PMC3743646/</a>                                                                             | positive | 8.9  | 1 |
| <b>British Columbia</b> |                                                                                                                                                                                                     |          |      |   |
| 71                      | <a href="http://www.minorchiropractic.com/articles/vaccination/">http://www.minorchiropractic.com/articles/vaccination/</a>                                                                         | negative | 25.4 | 1 |
| 72                      | <a href="http://www.sumasmtchiropractic.com/index.php?search=vacc&amp;p=240601&amp;Submit=Search">http://www.sumasmtchiropractic.com/index.php?search=vacc&amp;p=240601&amp;Submit=Search</a>       | negative | 26.8 | 1 |
| 73                      | <a href="http://www.edwinlauchiropractic.com/newsletters/OHU-2009%2001-12.pdf">http://www.edwinlauchiropractic.com/newsletters/OHU-2009%2001-12.pdf</a>                                             | negative | 30.4 | 2 |
| 74                      | <a href="http://www.focuschiropractic.ca/articles/vaccination/">http://www.focuschiropractic.ca/articles/vaccination/</a>                                                                           | negative | 25.4 | 1 |
| 75                      | <a href="http://nswellness.ca/cold-and-flu-prevention/">http://nswellness.ca/cold-and-flu-prevention/</a>                                                                                           | neutral  | 10.7 | 1 |
| 76                      | <a href="http://www.metrochiro.com/articles/vaccination/">http://www.metrochiro.com/articles/vaccination/</a>                                                                                       | neutral  | 25.4 | 1 |
| <b>Alberta</b>          |                                                                                                                                                                                                     |          |      |   |
| 77                      | <a href="https://www.naturmend.com/blog/2013/01/30/jan-30-the-flu-is-finally-retreating/">https://www.naturmend.com/blog/2013/01/30/jan-30-the-flu-is-finally-retreating/</a>                       | negative | 17.9 | 1 |
| 78                      | <a href="http://www.calgaryspineandsport.com/">www.calgaryspineandsport.com/</a>                                                                                                                    | negative | 13.3 | 1 |
| 79                      | <a href="http://corechiropracticandwellness.com/Vaccines">http://corechiropracticandwellness.com/Vaccines</a>                                                                                       | negative | 14.3 | 1 |
| 80                      | <a href="http://www.gatewaychiropractic.ca/">www.gatewaychiropractic.ca/</a>                                                                                                                        | neutral  | 14.3 | 1 |
| <b>Manitoba</b>         |                                                                                                                                                                                                     |          |      |   |
| 81                      | <a href="http://www.krampchiropractic.com/">http://www.krampchiropractic.com/</a>                                                                                                                   | negative | 13.3 | 1 |
| 82                      | <a href="http://www.loewenchiropracticclinic.com/">http://www.loewenchiropracticclinic.com/</a>                                                                                                     | negative | 11.5 | 1 |
| 83                      | <a href="http://entertogetwell.ca/chiropractic-care-for-kids/">http://entertogetwell.ca/chiropractic-care-for-kids/</a>                                                                             | neutral  | 17.9 | 1 |
| <b>New Brunswick</b>    |                                                                                                                                                                                                     |          |      |   |
| 84                      | <a href="http://www.chiroplusdieppe.ca/pregnancy-and-children">http://www.chiroplusdieppe.ca/pregnancy-and-children</a>                                                                             | negative | 28.6 | 1 |
| 85                      | <a href="http://rothesaychiropractic.ca/?s=vaccin">http://rothesaychiropractic.ca/?s=vaccin</a>                                                                                                     | neutral  | 10.7 | 1 |
| 86                      | <a href="http://www.frederictonchiropractors.com/community-links">http://www.frederictonchiropractors.com/community-links</a>                                                                       | neutral  | 69.6 | 4 |
| <b>Newfoundland</b>     |                                                                                                                                                                                                     |          |      |   |
| 87                      | <a href="http://dynamishealthcentre.com/">http://dynamishealthcentre.com/</a>                                                                                                                       | negative | 24.6 | 2 |
| 88                      | <a href="http://www.drburton.com/dr-burton-blog">http://www.drburton.com/dr-burton-blog</a>                                                                                                         | negative | 14.3 | 1 |
| <b>Nova Scotia</b>      |                                                                                                                                                                                                     |          |      |   |

|        |                                                                                                                                                                                                                                                   |          |      |   |
|--------|---------------------------------------------------------------------------------------------------------------------------------------------------------------------------------------------------------------------------------------------------|----------|------|---|
| 89     | <a href="http://atlantic.ctvnews.ca/vaccination-debate-why-some-parents-are-choosing-not-to-vaccinate-their-kids-1.1796563">http://atlantic.ctvnews.ca/vaccination-debate-why-some-parents-are-choosing-not-to-vaccinate-their-kids-1.1796563</a> | negative | 14.3 | 1 |
| 90     | <a href="http://www.pillarsofhealth.ca/?s=vaccin">http://www.pillarsofhealth.ca/?s=vaccin</a>                                                                                                                                                     | negative | 64.3 | 3 |
| 91     | <a href="http://www.robieatspringgardenchiropractic.com/articles/vaccine/">http://www.robieatspringgardenchiropractic.com/articles/vaccine/</a>                                                                                                   | negative | 19.5 | 1 |
| Quebec |                                                                                                                                                                                                                                                   |          |      |   |
| 92     | <a href="http://chiropratiquessante.com/revue-trimestriell/">http://chiropratiquessante.com/revue-trimestriell/</a>                                                                                                                               | negative | 19.2 | 1 |
| 93     | <a href="http://www.triade.ca/index.pl/liens">http://www.triade.ca/index.pl/liens</a>                                                                                                                                                             | negative | 17.9 | 1 |
| 94     | <a href="http://www.sourcedevitalite.com/conference-sur-la-vaccination">http://www.sourcedevitalite.com/conference-sur-la-vaccination</a>                                                                                                         | neutral  | 16.1 | 1 |

WRRT: Web Resource Rating Tool
